# Supplementary material
Source: PubMed Central journal article supplement (PMC7451132)
Supplement: NIHMS1545617-supplement-1.pdf [file NIHMS1545617-supplement-1.pdf]

Suppl. Figure 1.

Summary of path analysis showing significant predictors of *intended* changes in depression from before to after a psychedelic experience (N=366). \*\*p<.01, \*\*\*p<.001

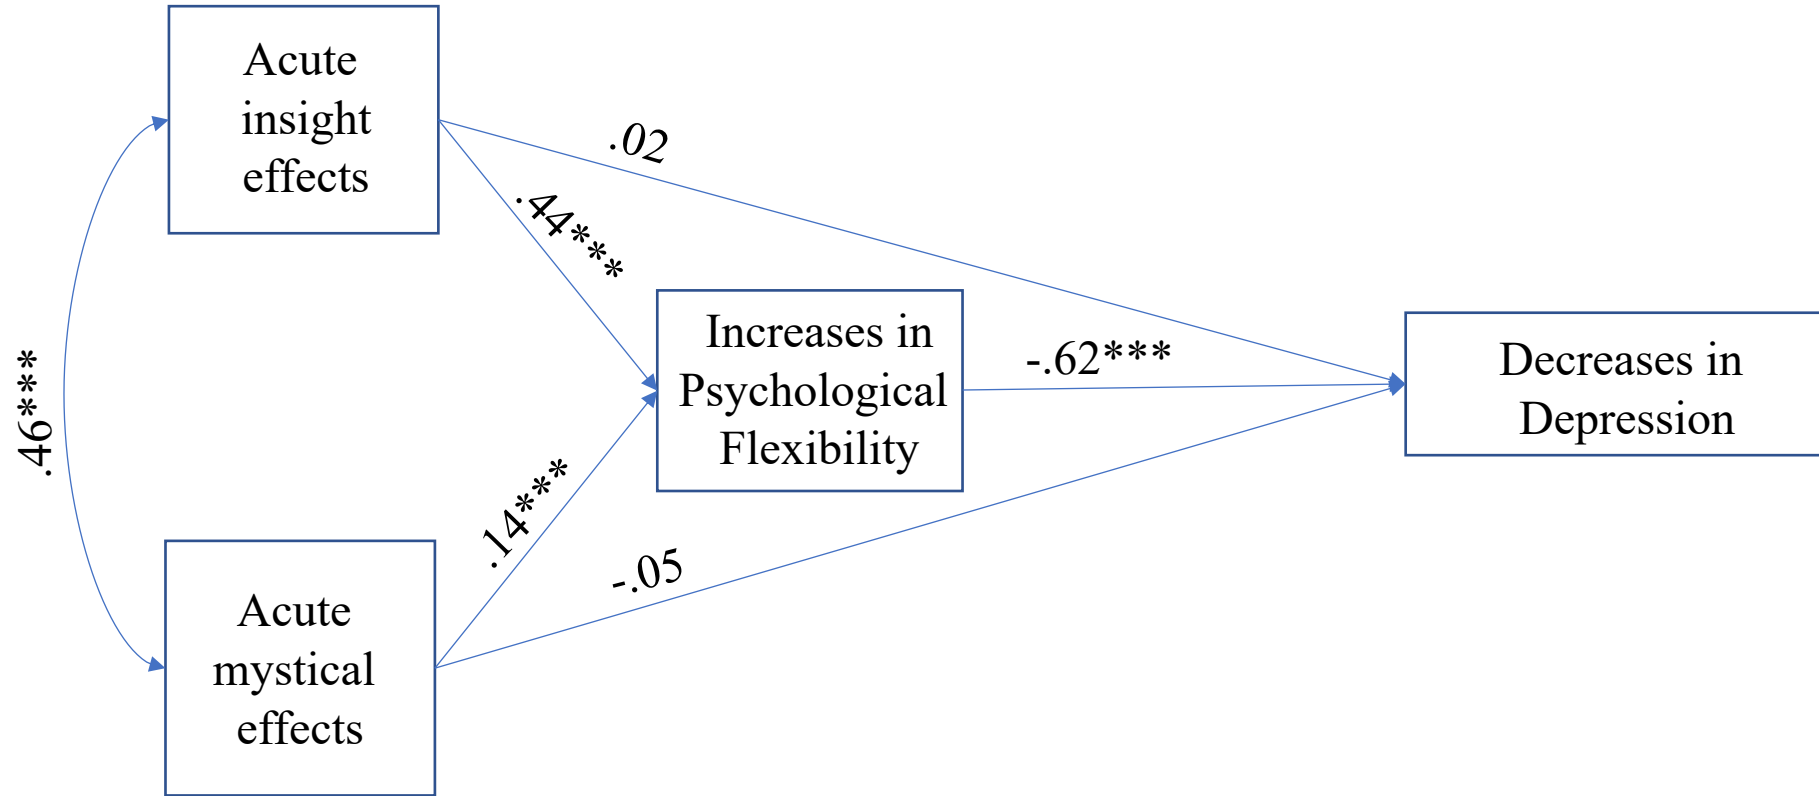

Model Fit: Adequate

RMSEA = .099 (CI: .024, .198)

CFI = .987

WRMR = .421

Controlling for age and sex

Indirect Effects:

Mystical on DepChange via PsychFlex: .09 (.02), p<.001

Insight on DepChange via PsychFlex: .27 (.03), p<.001

Suppl. Figure 2.

Summary of path analysis showing significant predictors of *spontaneous (i.e. not intended)* changes in depression from before to after a psychedelic experience (N=280). \*p<.05, \*\*p<.01, \*\*\*p<.001

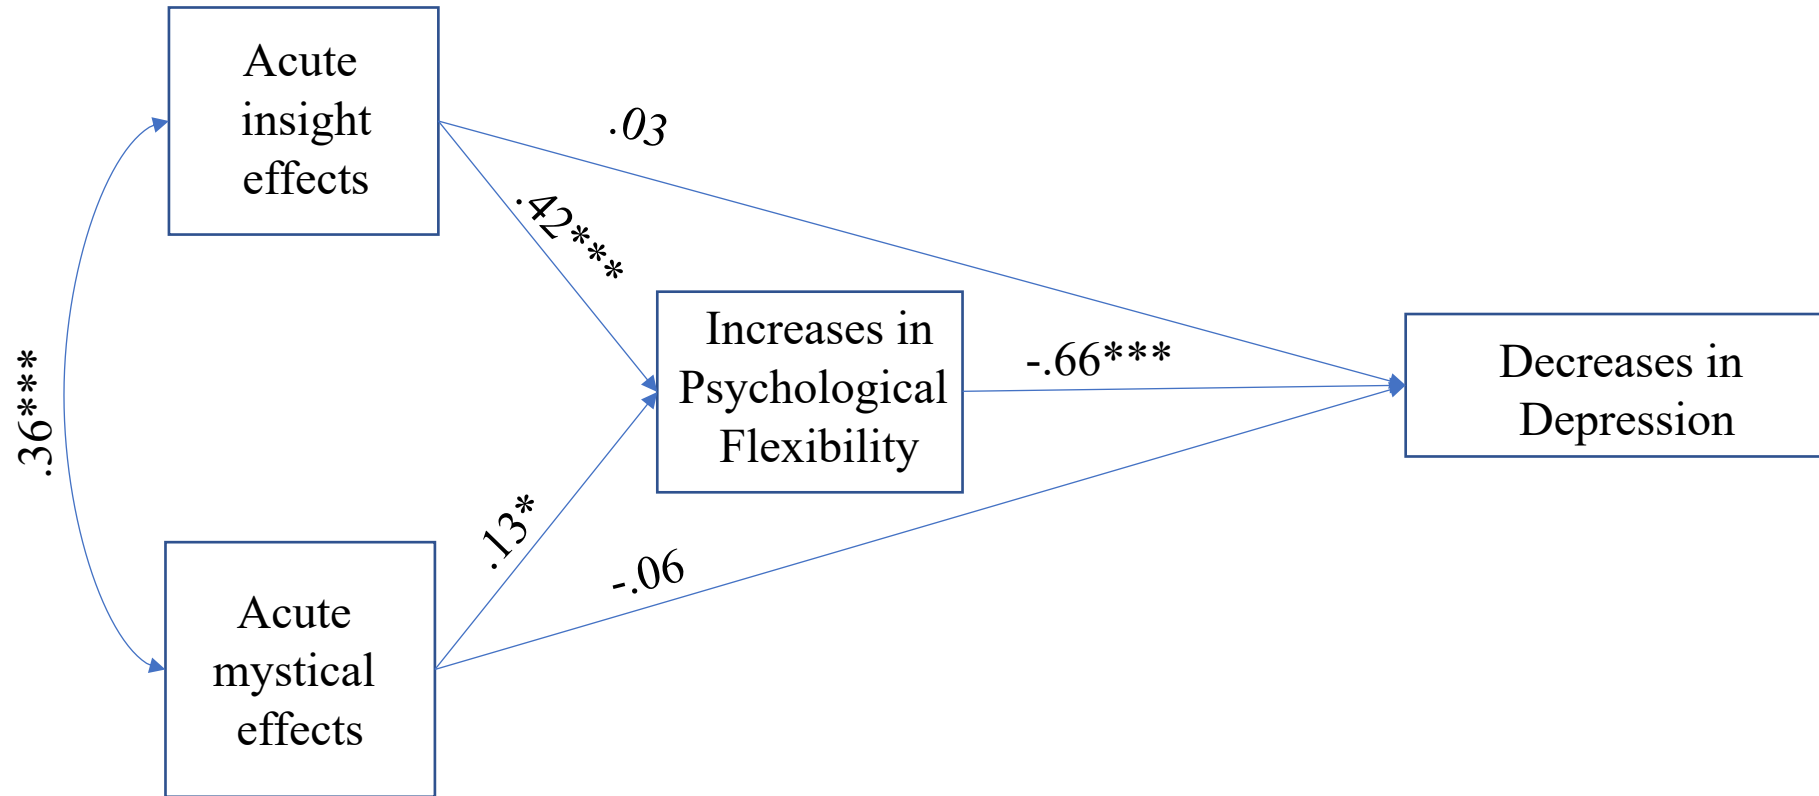

Model Fit: Excellent  
RMSEA = .000 (CI: .000, .000)  
CFI = 1.000  
WRMR = .008  
Controlling for age and sex

Indirect Effects:  
Mystical on DepChange via PsychFlex: .08 (.04), p=.017  
Insight on DepChange via PsychFlex: .28 (.03), p<.001

Suppl. Figure 3.

Summary of path analysis showing significant predictors of *intended* changes in anxiety from before to after a psychedelic experience (N=142). \*\*\*p<.001

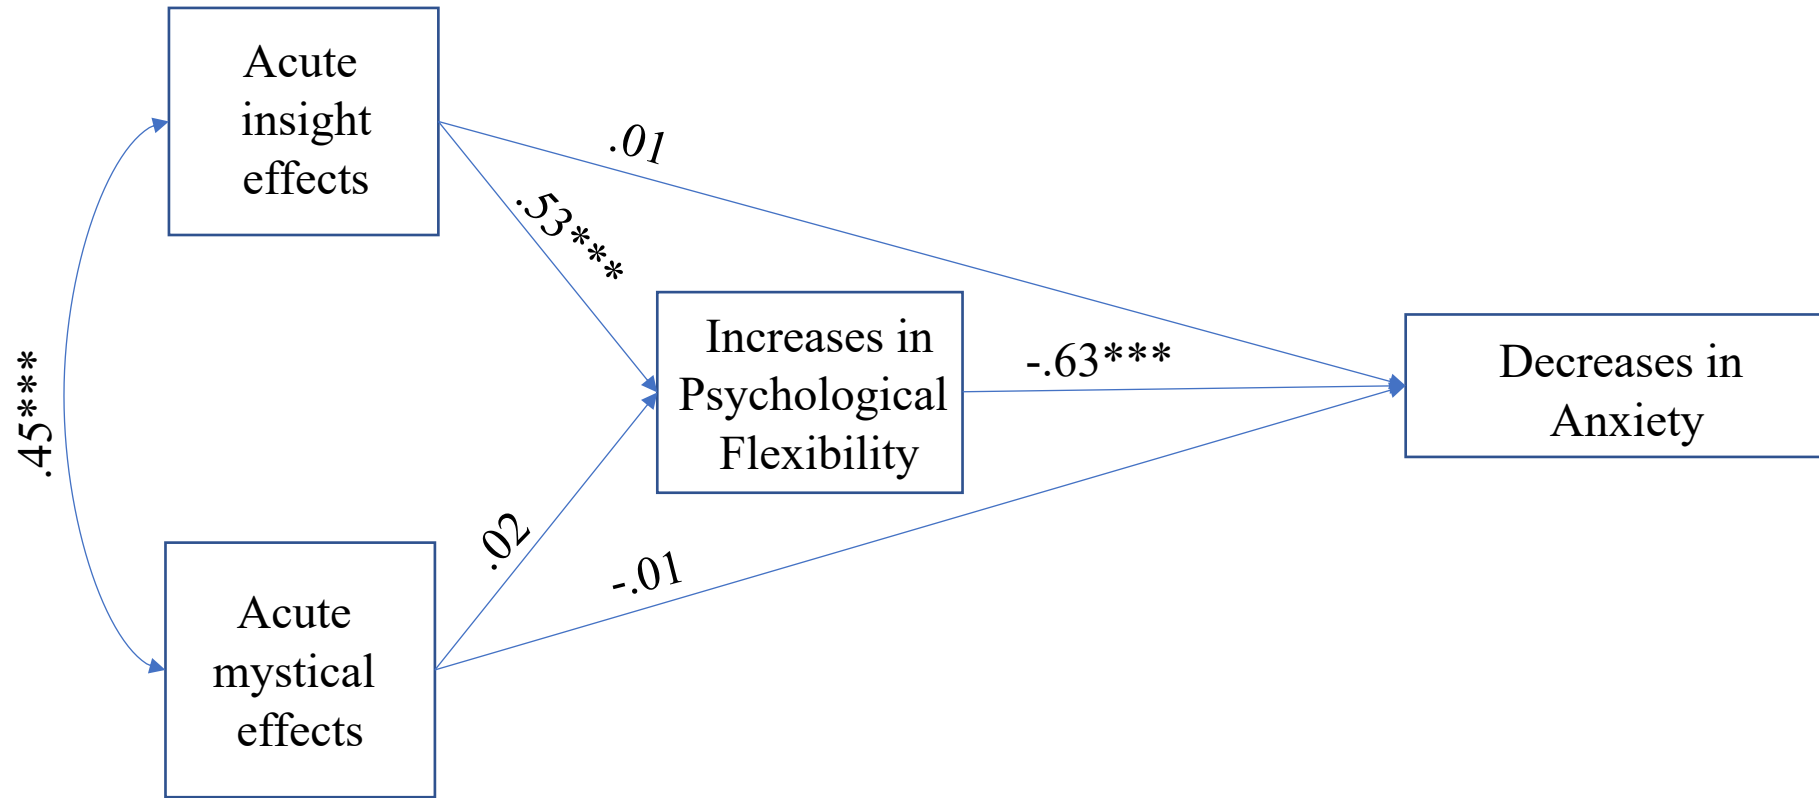

Model Fit: Good

RMSEA = .060 (CI: .000, .241)

CFI = .994

WRMR = .241

Controlling for age and sex

Indirect Effects:

Mystical on AnxChange via PsychFlex: .02 (.07), p=.825

Insight on AnxChange via PsychFlex: .34 (.06), p<.001

Suppl. Figure 4.

Summary of path analysis showing significant predictors of *spontaneous (i.e. not intended)* changes in anxiety from before to after a psychedelic experience (N=197). \*\*\*p<.001

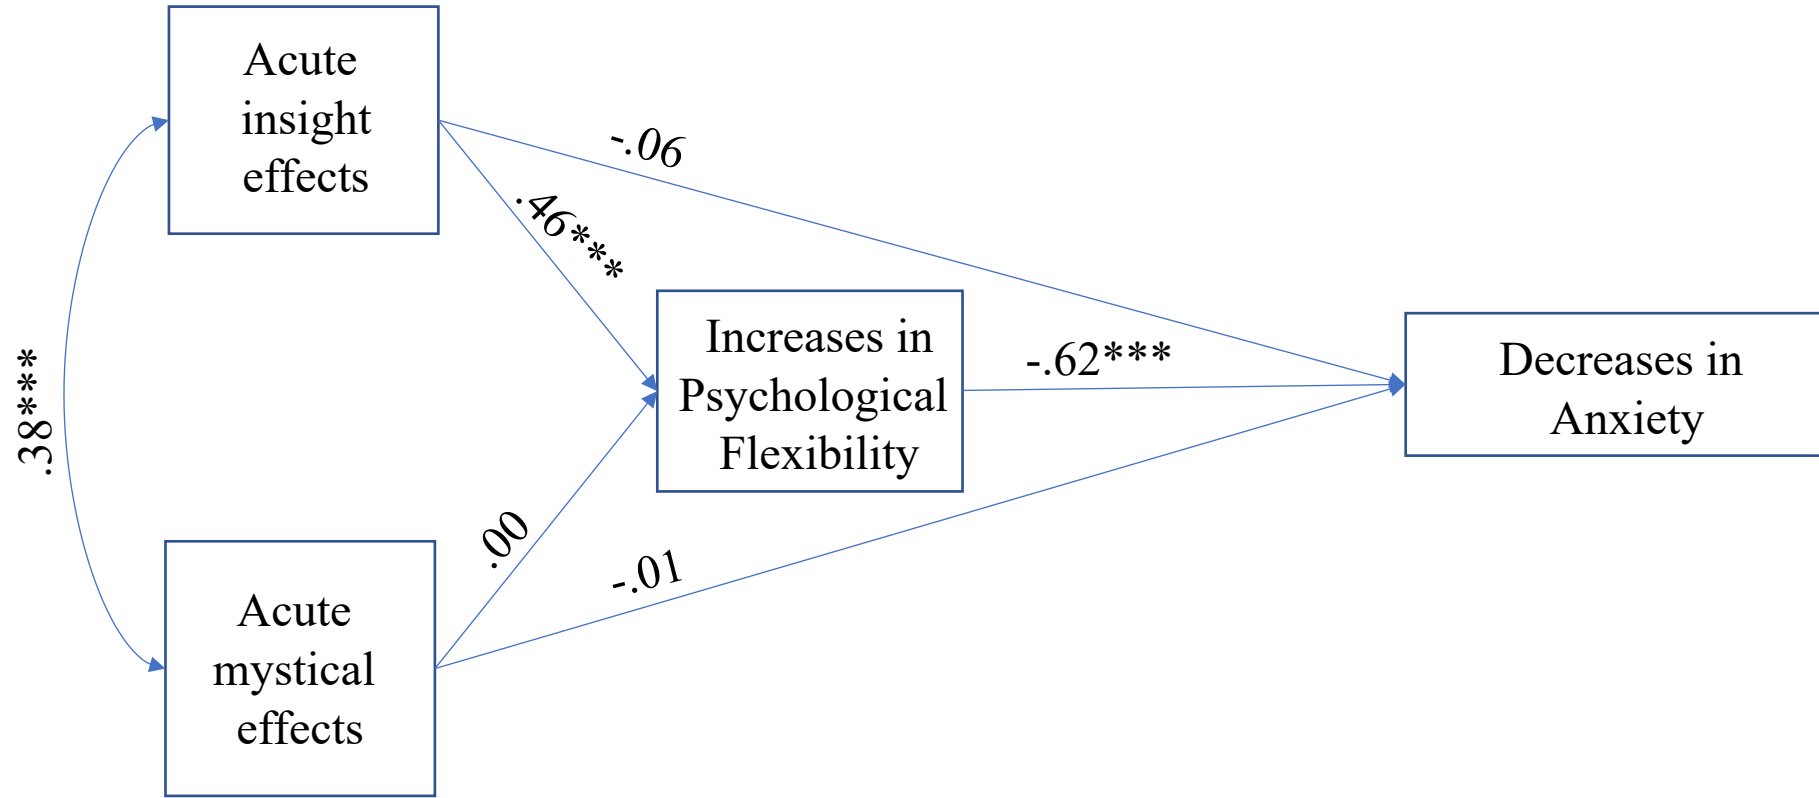

Model Fit: Excellent

RMSEA = .000 (CI: .000, .183)

CFI = 1.000

WRMR = .181

Controlling for age and sex

Indirect Effects:

Mystical on AnxChange via PsychFlex: .00 (.04), p=.994

Insight on AnxChange via PsychFlex: .29 (.04), p<.001
